# Supplementary material for: Low muscle mass in lung cancer is associated with an inflammatory and immunosuppressive tumor microenvironment
Source: Springer Nature journal article supplement (doi:10.1186/s12967-023-03901-5), 2023-02-11
Supplement: MOESM1 [file 24019002]

**Additional file.** Information regarding the software, tools, and databases used in the methodology.

| <b>Software, tools, and databases</b> | <b>Web page</b>                                                                                                                                                 | <b>Version</b> | <b>Reference</b> |
|---------------------------------------|-----------------------------------------------------------------------------------------------------------------------------------------------------------------|----------------|------------------|
| NSCLC-Radiogenomics collection        | <a href="https://wiki.cancerimagingarchive.net/display/Public/NSCLC+Radiogenomics">https://wiki.cancerimagingarchive.net/display/Public/NSCLC+Radiogenomics</a> |                | [1]              |
| gcrma human dataset                   |                                                                                                                                                                 |                | [2]              |
| Slice-O-Matic                         | <a href="https://www.tomovision.com/products/sliceomatic.html">https://www.tomovision.com/products/sliceomatic.html</a>                                         | v.5.0          |                  |
| Cutoff Finder                         |                                                                                                                                                                 | v1.0           | [3]              |
| rpart                                 | <a href="https://cran.r-project.org/web/packages/rpart/index.html">https://cran.r-project.org/web/packages/rpart/index.html</a>                                 | v4.1           |                  |
| RStudio                               | <a href="https://www.rstudio.com/">https://www.rstudio.com/</a>                                                                                                 | v.4.1.0        |                  |
| R                                     | <a href="https://cran.r-project.org/">https://cran.r-project.org/</a>                                                                                           | v3.5.1         |                  |
| easyROC                               | <a href="http://www.biosoft.hacettepe.edu.tr/easyROC/">http://www.biosoft.hacettepe.edu.tr/easyROC/</a>                                                         | v. 1.3.1       | [4]              |
| Human Protein Atlas                   | <a href="http://www.proteinatlas.org">http://www.proteinatlas.org</a>                                                                                           | v18.1          | [5]              |
| Cytoscape                             | <a href="https://cytoscape.org/">https://cytoscape.org/</a>                                                                                                     | v3.7.2         | [6]              |
| CytoNCA                               | <a href="https://apps.cytoscape.org/apps/cytonca">https://apps.cytoscape.org/apps/cytonca</a>                                                                   | v2.1.6         | [7]              |
| GTEEx portal                          | <a href="https://www.gtexpportal.org/">https://www.gtexpportal.org/</a>                                                                                         | V8             | [8]              |
| cellxgene Data Portal                 | <a href="https://cellxgene.cziscience.com">https://cellxgene.cziscience.com</a>                                                                                 | v0.16.0        |                  |
| The Cancer Imaging Archive            | <a href="http://cancerimagingarchive.net">http://cancerimagingarchive.net</a>                                                                                   |                | [9]              |
| BioGPS                                | <a href="http://biogps.org/">http://biogps.org/</a>                                                                                                             |                | [10]             |
| SankeyMATIC                           | <a href="http://sankeymatic.com/">http://sankeymatic.com/</a>                                                                                                   |                |                  |
| Cancer Cell Line Encyclopedia portal  | <a href="https://portals.broadinstitute.org/ccle">https://portals.broadinstitute.org/ccle</a>                                                                   |                | [11]             |
| TCGA-110CL Cell Line Panel            | <a href="https://comphealth.ucsf.edu/app/tcga-110">https://comphealth.ucsf.edu/app/tcga-110</a>                                                                 |                | [12]             |
| Human Cancer Model Initiative catalog | <a href="https://ocg.cancer.gov/programs/hcmi/">https://ocg.cancer.gov/programs/hcmi/</a>                                                                       |                |                  |
| CIBERSORTx                            | <a href="https://cibersortx.stanford.edu/">https://cibersortx.stanford.edu/</a>                                                                                 |                | [13]             |
| Immune Cell Abundance Identifier      | <a href="http://bioinfo.life.hust.edu.cn/ImmuCellAI#!/">http://bioinfo.life.hust.edu.cn/ImmuCellAI#!/</a>                                                       |                | [14]             |
| CellPhoneDB                           | <a href="https://www.cellphonedb.org/">https://www.cellphonedb.org/</a>                                                                                         |                | [15]             |
| EnrichR                               | <a href="https://maayanlab.cloud/Enrichr/">https://maayanlab.cloud/Enrichr/</a>                                                                                 |                | [16,17]          |
| Biojupies                             | <a href="https://amp.pharm.mssm.edu/biojupies/">https://amp.pharm.mssm.edu/biojupies/</a>                                                                       |                | [18]             |
| ClustVis                              | <a href="https://biit.cs.ut.ee/clustvis/">https://biit.cs.ut.ee/clustvis/</a>                                                                                   |                | [19]             |

## References

1. Bakr S, Gevaert O, Echegaray S, Ayers K, Zhou M, Shafiq M, et al. Data for NSCLC Radiogenomics Collection [Internet]. The Cancer Imaging Archive; 2017 [cited 2020 Dec 17]. Available from: <https://wiki.cancerimagingarchive.net/x/W4G1AQ>
2. Su AI, Wiltshire T, Batalov S, Lapp H, Ching KA, Block D, et al. A gene atlas of the mouse and human protein-encoding transcriptomes. *Proceedings of the National Academy of Sciences*. 2004;101:6062–7.
3. Budczies J, Klauschen F, Sinn BV, Györfy B, Schmitt WD, Darb-Esfahani S, et al. Cutoff Finder: A Comprehensive and Straightforward Web Application Enabling Rapid Biomarker Cutoff Optimization. van Diest P, editor. *PLoS ONE*. 2012;7:e51862.
4. Goksuluk D, Korkmaz S, Zararsiz G, Karaagaoglu A Ergun. easyROC: An Interactive Web-tool for ROC Curve Analysis Using R Language Environment. *The R Journal*. 2016;8:213.
5. Thul PJ, Åkesson L, Wiking M, Mahdessian D, Geladaki A, Ait Blal H, et al. A subcellular map of the human proteome. *Science*. 2017;356:eaal3321.
6. Shannon P. Cytoscape: A Software Environment for Integrated Models of Biomolecular Interaction Networks. *Genome Research*. 2003;13:2498–504.
7. Tang Y, Li M, Wang J, Pan Y, Wu F-X. CytoNCA: A cytoscape plugin for centrality analysis and evaluation of protein interaction networks. *Biosystems*. 2015;127:67–72.
8. Robinson MD, Oshlack A. A scaling normalization method for differential expression analysis of RNA-seq data. *Genome Biol*. 2010;11:R25.
9. Clark K, Vendt B, Smith K, Freymann J, Kirby J, Koppel P, et al. The Cancer Imaging Archive (TCIA): Maintaining and Operating a Public Information Repository. *J Digit Imaging*. 2013;26:1045–57.
10. Wu C, Orozco C, Boyer J, Leglise M, Goodale J, Batalov S, et al. BioGPS: an extensible and customizable portal for querying and organizing gene annotation resources. *Genome Biol*. 2009;10:R130.
11. Barretina J, Caponigro G, Stransky N, Venkatesan K, Margolin AA, Kim S, et al. The Cancer Cell Line Encyclopedia enables predictive modelling of anticancer drug sensitivity. *Nature*. 2012;483:603–7.
12. Yu K, Chen B, Aran D, Charalel J, Yau C, Wolf DM, et al. Comprehensive transcriptomic analysis of cell lines as models of primary tumors across 22 tumor types. *Nat Commun*. 2019;10:3574.
13. Chen B, Khodadoust MS, Liu CL, Newman AM, Alizadeh AA. Profiling Tumor Infiltrating Immune Cells with CIBERSORT. In: von Stechow L, editor. *Cancer Systems Biology* [Internet]. New York, NY: Springer New York; 2018 [cited 2020 Dec 17]. p. 243–59. Available from: [http://link.springer.com/10.1007/978-1-4939-7493-1\\_12](http://link.springer.com/10.1007/978-1-4939-7493-1_12)

14. Miao Y, Zhang Q, Lei Q, Luo M, Xie G, Wang H, et al. ImmuCellAI: A Unique Method for Comprehensive T-Cell Subsets Abundance Prediction and its Application in Cancer Immunotherapy. *Adv Sci.* 2020;7:1902880.
15. Efremova M, Vento-Tormo M, Teichmann SA, Vento-Tormo R. CellPhoneDB: inferring cell–cell communication from combined expression of multi-subunit ligand–receptor complexes. *Nat Protoc.* 2020;15:1484–506.
16. Chen EY, Tan CM, Kou Y, Duan Q, Wang Z, Meirelles G, et al. Enrichr: interactive and collaborative HTML5 gene list enrichment analysis tool. *BMC Bioinformatics.* 2013;14:128.
17. Kuleshov MV, Jones MR, Rouillard AD, Fernandez NF, Duan Q, Wang Z, et al. Enrichr: a comprehensive gene set enrichment analysis web server 2016 update. *Nucleic Acids Res.* 2016;44:W90–7.
18. Torre D, Lachmann A, Ma'ayan A. BioJupies: Automated Generation of Interactive Notebooks for RNA-Seq Data Analysis in the Cloud. *Cell Systems.* 2018;7:556-561.e3.
19. Metsalu T, Vilo J. ClustVis: a web tool for visualizing clustering of multivariate data using Principal Component Analysis and heatmap. *Nucleic Acids Res.* 2015;43:W566–70.
